# Supplementary material for: Optimizing Precision Medicine for Breast Cancer Brain Metastases with Functional Drug Response Assessment
Source: PubMed Central journal article supplement (PMC10284082; doi:10.1158/2767-9764.crc-22-0492), 2023-06-21
Supplement: crc-22-0492-s02.pdf [file crc-22-0492-s02.pdf]

**S2. Molecular aberrations comparing paired primary breast cancer and brain metastases:  
Group A case series.**

| Case ID | Clinical subtype | Breast primary                                                                | Brain met                                                                                                                                                            |
|---------|------------------|-------------------------------------------------------------------------------|----------------------------------------------------------------------------------------------------------------------------------------------------------------------|
| BCBM001 | TNBC             | TP53 (L257P)                                                                  | TP53 (L257P)                                                                                                                                                         |
| BCBM002 | HER2+            | TP53 (R273H)                                                                  | TP53 (R273H)                                                                                                                                                         |
| BCBM003 | TNBC             | TP53 (R248L)                                                                  | TP53 (R248L)                                                                                                                                                         |
| BCBM004 | HER2+            | TP53 (R273C)                                                                  | TP53 (R273C)                                                                                                                                                         |
| BCBM005 | TNBC             | Insufficient data due to poor coverage                                        | TP53 (S106_R110 del)<br>PIK3R1 (K567E), LOH                                                                                                                          |
| BCBM006 | TNBC             | TP53 (C176S), LOH                                                             | TP53 (C176S), LOH                                                                                                                                                    |
| BCBM007 | HER2+            | TP53 (R248Q), LOH                                                             | TP53 (R248Q), LOH<br><b>CCNE1 Amplification</b>                                                                                                                      |
| BCBM008 | TNBC             | TP53 (Q104*), LOH<br>NOTCH2 (Y2392*)<br>PTEN deletion<br><b>CDH1 deletion</b> | TP53 (p.Q104*), LOH<br>NOTCH2 (p.Y2392*)<br>PTEN deletion                                                                                                            |
| BCBM009 | HER2+            | TP53 (V173L), LOH<br>CCND1 Amplification                                      | TP53 (V173L), LOH<br>CCND1 Amplification<br><b>CDKN2A deletion</b>                                                                                                   |
| BCBM010 | HER2+            | TP53 (G244D)                                                                  | TP53 (G244D)                                                                                                                                                         |
| BCBM011 | HR+HER2-         | ARID1A (Q1095fs)<br>GATA3 (V314fs, G378fs)<br>SETD1B (Q371*)                  | ARID1A (p.Q1095fs)<br>GATA3 (p.V314fs, p.G378fs)<br>SETD1B (p.Q371*)<br><b>Hyper-mutation (APOBEC)</b><br><b>PIK3CA (E545K)</b><br><b>ESR1 (E380Q, D273N, D351H)</b> |
| BCBM012 | TNBC             | RB1 (Splice acceptor), LOH<br>TP53 (S90fs), LOH                               | RB1 (Splice acceptor), LOH<br>TP53 (p.S90fs, p.W91fs ), LOH                                                                                                          |
