# Supplementary material for: Optimizing Precision Medicine for Breast Cancer Brain Metastases with Functional Drug Response Assessment
Source: PubMed Central journal article supplement (PMC10284082; doi:10.1158/2767-9764.crc-22-0492), 2023-06-21

**S3. Genomic comparison across the different metastatic sites compared to the matched primary. A. Genomic alterations across metastatic sites compared to matched primary B. Copy number variations across metastatic sites compared to matched primary**

A.

| Breast primary                             | Brain met                                                     | Lung met                                         |
|--------------------------------------------|---------------------------------------------------------------|--------------------------------------------------|
| <b>TMB 5</b>                               | <b>TMB 28.7</b>                                               | <b>TMB 35.7</b>                                  |
| ARID1A (Q1095fs)<br>GATA3 (V314fs, G378fs) | ARID1A (p.Q1095fs)<br>GATA3 (p.V314fs, p.G378fs)              | ARID1A (p.Q1095fs)<br>GATA3 (p.V314fs, p.G378fs) |
| SETD1B (Q371*)                             | SETD1B (p.Q371*)<br>Hyper-mutation (APOBEC)<br>PIK3CA (E545K) | Hyper-mutation (APOBEC)<br>PIK3CA (E545K)        |
|                                            | ESR1 (E380Q, D273N, D351H)                                    | ESR1 (E380Q, D273N, D351H)                       |

B.

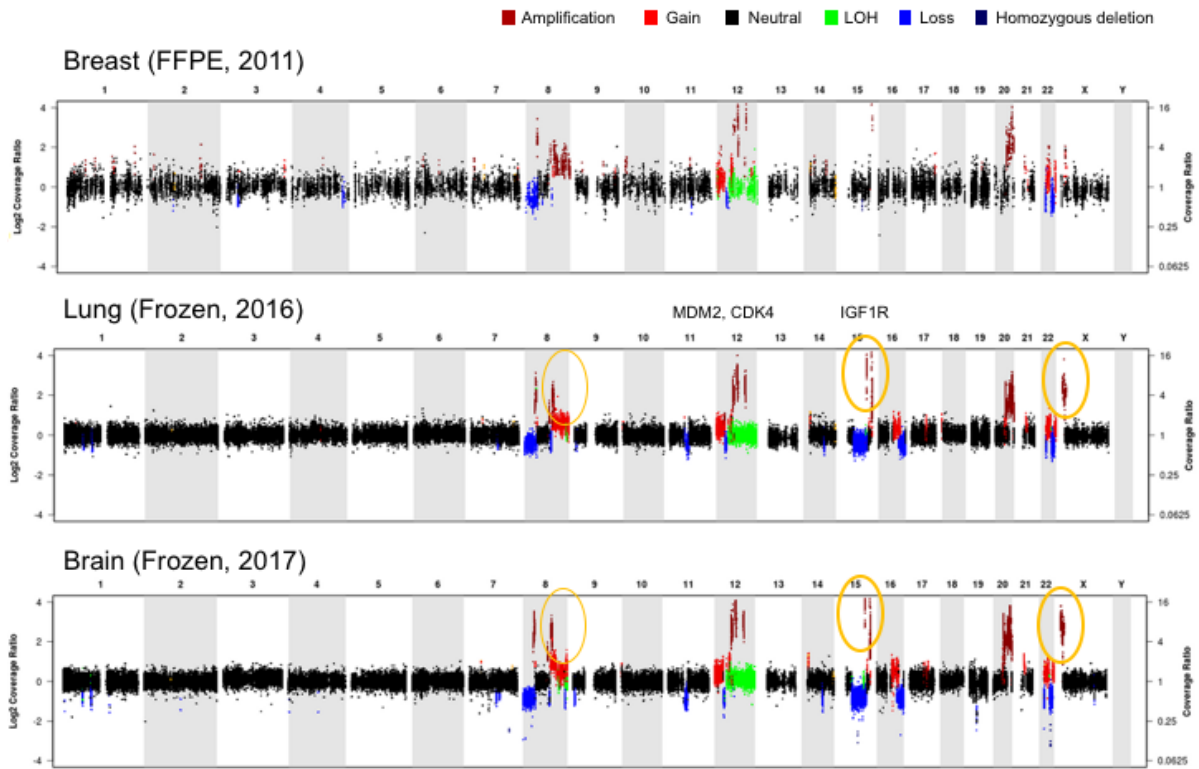

Supplement: crc-22-0492-s03.pdf [file crc-22-0492-s03.pdf]
