# Supplementary material for: Optimizing Precision Medicine for Breast Cancer Brain Metastases with Functional Drug Response Assessment
Source: PubMed Central journal article supplement (PMC10284082; doi:10.1158/2767-9764.crc-22-0492), 2023-06-21
Supplement: crc-22-0492-s04.pdf [file crc-22-0492-s04.pdf]

#### S4. Ipathway analysis table

| Pathway name                           | Pathway Id | p-value  | p-value (FDR) | p-value (Bonferroni) |
|----------------------------------------|------------|----------|---------------|----------------------|
| Olfactory transduction                 | 04740      | 7.478e-7 | 2.311e-4      | 2.311e-4             |
| Primary immunodeficiency *             | 05340      | 7.754e-6 | 5.245e-4      | 0.002                |
| Protein digestion and absorption *     | 04974      | 7.754e-6 | 5.245e-4      | 0.002                |
| Hematopoietic cell lineage *           | 04640      | 7.754e-6 | 5.245e-4      | 0.002                |
| Cytokine-cytokine receptor interaction | 04060      | 8.488e-6 | 5.245e-4      | 0.003                |

\* the p-value corresponding to the pathway was computed using only over-representation analysis.
