# Supplementary material for: Optimizing Precision Medicine for Breast Cancer Brain Metastases with Functional Drug Response Assessment
Source: PubMed Central journal article supplement (PMC10284082; doi:10.1158/2767-9764.crc-22-0492), 2023-06-21
Supplement: crc-22-0492-s05.pdf [file crc-22-0492-s05.pdf]

### S5. GSEA analysis using the oncogenic, KEGG, and GOBP gene sets.

#### GSEA table for Oncogenic up-regulated gene sets (FDR < 0.05)

| NAME             | SIZE | ES         | NES       | p-val       | FDR q-value |
|------------------|------|------------|-----------|-------------|-------------|
| PIGF_UP.V1_UP    | 184  | 0.37999806 | 2.1691117 | 0           | 7.66E-05    |
| ERBB2_UP.V1_DN   | 190  | 0.35316053 | 2.0094836 | 0           | 0.001074609 |
| TBK1.DF_DN       | 280  | 0.28347325 | 1.7019244 | 0           | 0.015042434 |
| VEGF_A_UP.V1_DN  | 185  | 0.29627037 | 1.6866676 | 0           | 0.013255387 |
| RB_P107_DN.V1_DN | 120  | 0.3023082  | 1.613606  | 8.74E-04    | 0.02098995  |
| RB_P130_DN.V1_DN | 126  | 0.2854445  | 1.5376194 | 0.003938731 | 0.036148705 |

## GSEA table for Oncogenic down-regulated gene sets (FDR < 0.05)

| NAME                          | SIZE | ES         | NES        | p-val      | FDR q-value |
|-------------------------------|------|------------|------------|------------|-------------|
| KRAS.PROSTATE_UP.V1_UP        | 98   | -0.5134683 | -2.299555  | 0          | 0           |
| KRAS.600.LUNG.BREAST_UP.V1_UP | 176  | -0.4695035 | -2.2835803 | 0          | 0           |
| KRAS.BREAST_UP.V1_UP          | 89   | -0.4960229 | -2.1829803 | 0          | 0           |
| KRAS.LUNG.BREAST_UP.V1_UP     | 93   | -0.4846052 | -2.1521356 | 0          | 0           |
| KRAS.LUNG_UP.V1_UP            | 94   | -0.4757321 | -2.1105325 | 0          | 6.28E-05    |
| CAHOY_NEURONAL                | 62   | -0.4963074 | -2.051618  | 0          | 7.63E-05    |
| P53_DN.V2_UP                  | 96   | -0.4545239 | -2.037276  | 0          | 9.39E-05    |
| RELA_DN.V1_DN                 | 97   | -0.4399677 | -1.9602392 | 0          | 5.10E-04    |
| IL15_UP.V1_DN                 | 126  | -0.4122638 | -1.920542  | 0          | 7.79E-04    |
| JAK2_DN.V1_UP                 | 108  | -0.4216185 | -1.9118984 | 1.32E-04   | 7.64E-04    |
| RPS14_DN.V1_UP                | 169  | -0.3853375 | -1.8674365 | 0          | 0.00126314  |
| LEF1_UP.V1_UP                 | 172  | -0.3777391 | -1.8274897 | 0          | 0.00204783  |
| IL21_UP.V1_UP                 | 145  | -0.3804847 | -1.8082885 | 1.27E-04   | 0.00239922  |
| PTEN_DN.V1_DN                 | 121  | -0.3888049 | -1.7984138 | 1.30E-04   | 0.00248792  |
| BRCA1_DN.V1_UP                | 82   | -0.4115107 | -1.7910712 | 4.09E-04   | 0.00261858  |
| ATF2_UP.V1_UP                 | 126  | -0.3837714 | -1.7843652 | 0          | 0.00265331  |
| IL2_UP.V1_UP                  | 159  | -0.3689195 | -1.7741044 | 1.26E-04   | 0.00290406  |
| KRAS.KIDNEY_UP.V1_DN          | 88   | -0.3982481 | -1.749471  | 0.00149477 | 0.003836    |
| DCA_UP.V1_UP                  | 126  | -0.3741754 | -1.7391055 | 7.67E-04   | 0.00420364  |
| KRAS.600_UP.V1_UP             | 203  | -0.3503501 | -1.7383595 | 0          | 0.00403845  |
| KRAS.300_UP.V1_UP             | 107  | -0.3753077 | -1.7025163 | 6.58E-04   | 0.00607616  |
| P53_DN.V1_DN                  | 173  | -0.3507869 | -1.6983001 | 2.48E-04   | 0.00620596  |
| KRAS.50_UP.V1_UP              | 38   | -0.4575638 | -1.6971632 | 0.00627615 | 0.00605075  |
| RB_P107_DN.V1_UP              | 125  | -0.3657492 | -1.6965069 | 5.15E-04   | 0.00585956  |
| SRC_UP.V1_UP                  | 124  | -0.3638451 | -1.691479  | 5.16E-04   | 0.00602709  |
| IL15_UP.V1_UP                 | 161  | -0.3499104 | -1.6811961 | 6.25E-04   | 0.00657376  |
| PIGF_UP.V1_DN                 | 148  | -0.3472409 | -1.6576235 | 7.57E-04   | 0.00844398  |
| KRAS.BREAST_UP.V1_DN          | 103  | -0.3665667 | -1.6526378 | 0.00197576 | 0.00869104  |
| E2F3_UP.V1_UP                 | 168  | -0.3394752 | -1.6401621 | 4.95E-04   | 0.00973901  |
| JNK_DN.V1_DN                  | 146  | -0.3449201 | -1.6313322 | 3.82E-04   | 0.01046878  |
| CAMP_UP.V1_DN                 | 186  | -0.3264933 | -1.6034255 | 7.39E-04   | 0.01410773  |
| PTEN_DN.V1_UP                 | 135  | -0.3399975 | -1.5964662 | 0.00254485 | 0.01489654  |
| ALK_DN.V1_UP                  | 100  | -0.3515601 | -1.5770893 | 0.00436681 | 0.01821641  |
| CAHOY_ASTROGLIAL              | 88   | -0.3584442 | -1.5765339 | 0.00569878 | 0.01780232  |
| VEGF_A_UP.V1_UP               | 158  | -0.3253332 | -1.5661472 | 0.00163132 | 0.01944393  |
| CYCLIN_D1_UP.V1_UP            | 154  | -0.3264754 | -1.5609566 | 0.00302077 | 0.02010019  |
| PRC1_BMI_UP.V1_UP             | 141  | -0.3300336 | -1.5605282 | 0.00292733 | 0.01969357  |
| PDGF_UP.V1_DN                 | 94   | -0.3529673 | -1.5599719 | 0.00720865 | 0.0192949   |
| PRC2_SUZ12_UP.V1_UP           | 141  | -0.325922  | -1.5430727 | 0.00457724 | 0.02276749  |
| RB_P130_DN.V1_UP              | 109  | -0.3356836 | -1.5277474 | 0.00834769 | 0.02628136  |
| KRAS.AMP.LUNG_UP.V1_DN        | 106  | -0.3370817 | -1.5270163 | 0.00862527 | 0.0258224   |
| KRAS.PROSTATE_UP.V1_DN        | 94   | -0.3437824 | -1.5264548 | 0.01114244 | 0.02538833  |
| KRAS.600.LUNG.BREAST_UP.V1_DN | 198  | -0.3088274 | -1.5213447 | 0.00302737 | 0.02621664  |
| IL2_UP.V1_DN                  | 143  | -0.3190751 | -1.5122533 | 0.00696291 | 0.02844425  |
| ATF2_S_UP.V1_UP               | 146  | -0.3157506 | -1.5024015 | 0.00497894 | 0.03117847  |
| PKCA_DN.V1_DN                 | 120  | -0.3231099 | -1.4912496 | 0.0098129  | 0.0345175   |
| JNK_DN.V1_UP                  | 142  | -0.3151889 | -1.4871517 | 0.00818125 | 0.03545722  |
| SNF5_DN.V1_UP                 | 162  | -0.3081793 | -1.4846565 | 0.00732646 | 0.0357143   |
| SNF5_DN.V1_DN                 | 133  | -0.3155903 | -1.4754627 | 0.01210716 | 0.03864779  |
| YAP1_UP                       | 43   | -0.3830668 | -1.4662932 | 0.03778338 | 0.04172044  |
| BMI1_DN_MEL18_DN.V1_UP        | 129  | -0.3098199 | -1.4555154 | 0.01447028 | 0.04582575  |

### GSEA table for KEGG up-regulated gene sets (FDR < 0.05)

| NAME                           | SIZE | ES  | NES        | p-val     | FDR q-value |             |
|--------------------------------|------|-----|------------|-----------|-------------|-------------|
| KEGG_PROTEIN_EXPORT            |      | 23  | 0.631071   | 2.3141265 | 0           | 9.33E-04    |
| KEGG_OXIDATIVE_PHOSPHORYLATION |      | 121 | 0.42155826 | 2.2039602 | 0           | 0.002276881 |
| KEGG_PARKINSONS_DISEASE        |      | 117 | 0.3875401  | 2.0368695 | 0           | 0.0068126   |
| KEGG_CITRATE_CYCLE_TCA_CYCLE   |      | 29  | 0.527474   | 2.056116  | 0           | 0.007522518 |

## GSEA table for KEGG down-regulated gene sets (FDR < 0.05)

| NAME                                              | SIZE | ES          | NES        | p-val       | FDR q-value |
|---------------------------------------------------|------|-------------|------------|-------------|-------------|
| KEGG_GRAFT_VERSUS_HOST_DISEASE                    | 26   | -0.84030366 | -2.515704  | 0           | 0           |
| KEGG_AUTOIMMUNE_THYROID_DISEASE                   | 25   | -0.8427207  | -2.5131416 | 0           | 0           |
| KEGG_INTESTINAL_IMMUNE_NETWORK_FOR_IGA_PRODUCTION | 32   | -0.80258304 | -2.5083468 | 0           | 0           |
| KEGG_HEMATOPOIETIC_CELL_LINEAGE                   | 62   | -0.71402407 | -2.4952674 | 0           | 0           |
| KEGG_ALLOGRAFT_REJECTION                          | 26   | -0.82865447 | -2.4935515 | 0           | 0           |
| KEGG_ASTHMA                                       | 17   | -0.9046613  | -2.4577773 | 0           | 0           |
| KEGG_PRIMARY_IMMUNODEFICIENCY                     | 26   | -0.75680894 | -2.2673798 | 0           | 0           |
| KEGG_CYTOKINE_CYTOKINE_RECEPTOR_INTERACTION       | 159  | -0.585377   | -2.2642326 | 0           | 0           |
| KEGG_TYPE_1_DIABETES_MELLITUS                     | 31   | -0.7248778  | -2.2580779 | 0           | 0           |
| KEGG_LEISHMANIA_INFECTION                         | 61   | -0.6452481  | -2.2441857 | 0           | 0           |
| KEGG_CELL_ADHESION_MOLECULES_CAMS                 | 112  | -0.5878192  | -2.2034686 | 0           | 0           |
| KEGG_VIRAL_MYOCARDITIS                            | 60   | -0.6162249  | -2.1354454 | 0           | 0           |
| KEGG_ECM_RECEPTOR_INTERACTION                     | 81   | -0.56642216 | -2.05313   | 0           | 5.46E-05    |
| KEGG_NEUROACTIVE_LIGAND_RECEPTOR_INTERACTION      | 147  | -0.5096956  | -1.9569695 | 0           | 2.93E-04    |
| KEGG_SYSTEMIC_LUPUS_ERYTHEMATOSUS                 | 103  | -0.50952756 | -1.898131  | 0           | 8.67E-04    |
| KEGG_CALCIUM_SIGNALING_PATHWAY                    | 143  | -0.48741472 | -1.8675388 | 0           | 0.001418914 |
| KEGG_ANTIGEN_PROCESSING_AND_PRESENTATION          | 54   | -0.5400128  | -1.8550544 | 0           | 0.001746663 |
| KEGG_CHEMOKINE_SIGNALING_PATHWAY                  | 142  | -0.45718867 | -1.7563272 | 0           | 0.006958953 |
| KEGG_NATURAL_KILLER_CELL_MEDIATED_CYTOTOXICITY    | 93   | -0.46455982 | -1.717646  | 1.07E-04    | 0.011132123 |
| KEGG_DRUG_METABOLISM_CYTOCHROME_P450              | 31   | -0.54923296 | -1.7078425 | 0.003699593 | 0.01209183  |
| KEGG_DILATED_CARDIOMYOPATHY                       | 74   | -0.46650556 | -1.6775744 | 8.86E-04    | 0.01647371  |
| KEGG_FOCAL_ADHESION                               | 190  | -0.42584896 | -1.6657133 | 0           | 0.018245969 |
| KEGG_ABC_TRANSPORTERS                             | 39   | -0.5074533  | -1.6487919 | 0.005799503 | 0.021292005 |
| KEGG_LEUKOCYTE_TRANSENDOTHELIAL_MIGRATION         | 97   | -0.44282904 | -1.6397674 | 0.001071467 | 0.022794547 |
| KEGG_HYPERTROPHIC_CARDIOMYOPATHY_HCM              | 67   | -0.46614856 | -1.6393937 | 0.002217541 | 0.021970354 |
| KEGG_T_CELL_RECEPTOR_SIGNALING_PATHWAY            | 93   | -0.44438422 | -1.6342639 | 0.001503114 | 0.022440786 |
| KEGG_B_CELL_RECEPTOR_SIGNALING_PATHWAY            | 71   | -0.45687383 | -1.6306418 | 0.001659476 | 0.022519669 |
| KEGG_JAK_STAT_SIGNALING_PATHWAY                   | 99   | -0.43428278 | -1.6104509 | 0.001070893 | 0.027168183 |
| KEGG_COMPLEMENT_AND_COAGULATION_CASCADES          | 51   | -0.4630738  | -1.5760622 | 0.009388039 | 0.037909135 |

### GSEA table for GOBP up-regulated gene sets (FDR < 0.05)

| NAME                                                                                               | SIZE | ES  | NES        | p-val     | FDR q-value           |
|----------------------------------------------------------------------------------------------------|------|-----|------------|-----------|-----------------------|
| GOBP_MITOCHONDRIAL_TRANSLATIONAL_TERMINATION                                                       |      | 89  | 0.5148428  | 2.5802567 | 0 7.97E-04            |
| GOBP_ER_NUCLEUS_SIGNALING_PATHWAY                                                                  |      | 52  | 0.55574876 | 2.5132298 | 0 7.99E-04            |
| GOBP_ATP_SYNTHESIS_COUPLED_ELECTRON_TRANSPORT                                                      |      | 93  | 0.47469223 | 2.4081469 | 0 0.00300918          |
| GOBP_REGULATION_OF_TRANSCRIPTION_FROM_RNA_POLYMERASE_II_PROMOTER_IN_RESPONSE_TO_HYP<br>OXIA        |      | 74  | 0.48969692 | 2.375456  | 0 0.00391304          |
| GOBP_TRANSLATIONAL_TERMINATION                                                                     |      | 104 | 0.44788104 | 2.320398  | 0 0.00644285          |
| GOBP_OXIDATIVE_PHOSPHORYLATION                                                                     |      | 135 | 0.42839652 | 2.2987373 | 0 0.00667296          |
| GOBP_REGULATION_OF_DNA_TEMPLATED_TRANSCRIPTION_IN_RESPONSE_TO_STRESS                               |      | 109 | 0.42872593 | 2.2605312 | 0 0.00908123          |
| GOBP_VIRION_ASSEMBLY                                                                               |      | 40  | 0.5290905  | 2.2503767 | 0 0.00885648          |
| GOBP_AEROBIC_RESPIRATION                                                                           |      | 81  | 0.44912013 | 2.2193592 | 0 0.01118527          |
| GOBP_CELLULAR_RESPONSE_TO_TOPOLOGICALLY_INCORRECT_PROTEIN                                          |      | 156 | 0.39882573 | 2.21625   | 0 0.01042456          |
| GOBP_MITOCHONDRIAL_ELECTRON_TRANSPORT_CYTOCHROME_C_TO_OXYGEN                                       |      | 18  | 0.65130705 | 2.215675  | 0 0.00958378          |
| GOBP_RESPIRATORY_ELECTRON_TRANSPORT_CHAIN                                                          |      | 108 | 0.42451945 | 2.2020218 | 0 0.01069079          |
| GOBP_MITOCHONDRIAL_TRANSLATION                                                                     |      | 134 | 0.40634346 | 2.183095  | 0 0.01220119          |
| GOBP_POSITIVE_REGULATION_OF_DNA_TEMPLATED_TRANSCRIPTION_ELONGATION                                 |      | 25  | 0.5804468  | 2.1814685 | 0 0.01154373          |
| GOBP_REGULATION_OF_NUCLEOBASE_CONTAINING_COMPOUND_TRANSPORT                                        |      | 15  | 0.6850738  | 2.180666  | 7.55E-04 0.0108532    |
| GOBP_ENDOPLASMIC_RETICULUM_MANNANOSE_TRIMMING                                                      |      | 16  | 0.66398025 | 2.1683912 | 7.80E-04 0.01178939   |
| GOBP_GOLGI_ORGANIZATION                                                                            |      | 127 | 0.40118575 | 2.1625478 | 0 0.01179032          |
| GOBP_REGULATION_OF_ENDOPLASMIC_RETICULUM_UNFOLDED_PROTEIN_RESPONSE                                 |      | 28  | 0.54766536 | 2.127553  | 4.99E-04 0.01662011   |
| GOBP_TRANSCRIPTION_ELONGATION_FROM_RNA_POLYMERASE_II_PROMOTER                                      |      | 81  | 0.42699003 | 2.106973  | 0 0.019527            |
| GOBP_ANAPHASE_PROMOTING_COMPLEX_DEPENDENT_CATABOLIC_PROCESS                                        |      | 78  | 0.4278212  | 2.1052907 | 0 0.01881966          |
| GOBP_COPII_COATED_VESICLE_BUDDING                                                                  |      | 71  | 0.43600196 | 2.1025982 | 0 0.01860879          |
| GOBP_VESICLE_CARGO_LOADING                                                                         |      | 20  | 0.5994502  | 2.0997443 | 4.23E-04 0.01841475   |
| GOBP_RESPONSE_TO_TOPOLOGICALLY_INCORRECT_PROTEIN                                                   |      | 191 | 0.37317285 | 2.0983012 | 0 0.01785151          |
| GOBP_UBIQUITIN_DEPENDENT_PROTEIN_CATABOLIC_PROCESS_VIA_THE_MULTIVESICULAR_BODY_SORTING<br>_PATHWAY |      | 23  | 0.56153846 | 2.0708737 | 0 0.02233192          |
| GOBP_ENDOPLASMIC_RETICULUM_UNFOLDED_PROTEIN_RESPONSE                                               |      | 117 | 0.3951727  | 2.0703301 | 0 0.02149398          |
| GOBP_MITOCHONDRIAL_GENE_EXPRESSION                                                                 |      | 165 | 0.37187043 | 2.069239  | 0 0.02093118          |
| GOBP_INTRA_GOLGI_VESICLE_MEDIATED_TRANSPORT                                                        |      | 30  | 0.52455705 | 2.0665505 | 0.00105152 0.02068525 |
| GOBP_INTEGRATED_STRESS_RESPONSE_SIGNALING                                                          |      | 26  | 0.54361326 | 2.0619016 | 4.93E-04 0.02084304   |
| GOBP_POSITIVE_REGULATION_OF_HISTONE_DEACETYLATION                                                  |      | 17  | 0.61732966 | 2.0602777 | 0.00118017 0.0203892  |
| GOBP_RNA_CAPPING                                                                                   |      | 33  | 0.50926226 | 2.0590794 | 0 0.02004727          |
| GOBP_ENDOPLASMIC_RETICULUM_TO_GOLGI_VESICLE_MEDIATED_TRANSPORT                                     |      | 189 | 0.36615774 | 2.053904  | 0 0.02038059          |
| GOBP_CELLULAR_RESPONSE_TO_STEROL_DEPLETION                                                         |      | 16  | 0.61905855 | 2.0474834 | 0.00113982 0.02082402 |
| GOBP_TRANSLATIONAL_ELONGATION                                                                      |      | 131 | 0.37939736 | 2.0455341 | 0 0.02055887          |
| GOBP_RNA_EXPORT_FROM_NUCLEUS                                                                       |      | 130 | 0.38322088 | 2.0451307 | 0 0.02003722          |
| GOBP_STEROL_BIOSYNTHETIC_PROCESS                                                                   |      | 66  | 0.4281963  | 2.0429168 | 0 0.0198856           |
| GOBP_VESICLE_BUDDING_FROM_MEMBRANE                                                                 |      | 107 | 0.3941925  | 2.0427673 | 0 0.01934462          |
| GOBP_PROTEIN_QUALITY_CONTROL_FOR_MISFOLDED_OR_INCOMPLETELY_SYNTHESIZED_PROTEINS                    |      | 28  | 0.52611256 | 2.0413876 | 0 0.01907022          |
| GOBP_VESICLE_TARGETING_TO_FROM_OR_WITHIN_GOLGI                                                     |      | 72  | 0.41854268 | 2.0374014 | 0 0.0192738           |
| GOBP_MRNA_EXPORT_FROM_NUCLEUS                                                                      |      | 105 | 0.39030963 | 2.024657  | 0 0.02098905          |
| GOBP_POSITIVE_REGULATION_OF_PROTEIN_DEACETYLATION                                                  |      | 21  | 0.56271714 | 2.0165682 | 0.00173989 0.02218876 |
| GOBP_DNA_TEMPLATED_TRANSCRIPTION_ELONGATION                                                        |      | 110 | 0.38521206 | 2.009029  | 0.0018018 0.02305034  |
| GOBP_POSITIVE_REGULATION_OF_CHROMOSOME_SEPARATION                                                  |      | 17  | 0.59824973 | 2.0012763 | 0.00119379 0.0239352  |
| GOBP_RETROGRADE_VESICLE_MEDIATED_TRANSPORT_GOLGI_TO_ENDOPLASMIC_RETICULUM                          |      | 83  | 0.40226033 | 2.001097  | 0 0.02341957          |
| GOBP_REGULATION_OF_CHOLESTEROL_BIOSYNTHETIC_PROCESS                                                |      | 42  | 0.46410406 | 2.0006864 | 6.29E-04 0.02294799   |
| GOBP_UBIQUITIN_DEPENDENT_ERAD_PATHWAY                                                              |      | 76  | 0.40638992 | 1.9988033 | 0 0.02279347          |
| GOBP_MITOCHONDRIAL_ELECTRON_TRANSPORT_NADH_TO_UBIQUINONE                                           |      | 52  | 0.440862   | 1.9870356 | 0 0.02451197          |
| GOBP_TRICARBOXYLIC_ACID_CYCLE                                                                      |      | 33  | 0.48046908 | 1.9466982 | 0.00164294 0.03401632 |
| GOBP_CHAPERONE_MEDIATED_AUTOPHAGY                                                                  |      | 16  | 0.5866304  | 1.9298283 | 0.00195389 0.03828349 |
| GOBP_NEGATIVE_REGULATION_OF_MACROAUTOPHAGY                                                         |      | 35  | 0.47340983 | 1.9274449 | 5.67E-04 0.03824441   |
| GOBP_INNER_MITOCHONDRIAL_MEMBRANE_ORGANIZATION                                                     |      | 56  | 0.41934046 | 1.9268379 | 0 0.03772754          |
| GOBP_PHOSPHATIDYLCHOLINE_BIOSYNTHETIC_PROCESS                                                      |      | 35  | 0.46212283 | 1.8968313 | 0.00235849 0.04686664 |

## GSEA table for GOBP down-regulated gene sets (FDR < 0.05)

| NAME                                                                                                                               | SIZE | ES         | NES        | p-val | FDR q-value |
|------------------------------------------------------------------------------------------------------------------------------------|------|------------|------------|-------|-------------|
| GOBP_B_CELL_RECEPTOR_SIGNALING_PATHWAY                                                                                             | 64   | -0.7669317 | -2.6880314 | 0     | 0           |
| GOBP_ADAPTIVE_IMMUNE_RESPONSE                                                                                                      | 342  | -0.6237414 | -2.5076084 | 0     | 0           |
| GOBP_ALPHA_BETA_T_CELL_ACTIVATION                                                                                                  | 121  | -0.6303483 | -2.387556  | 0     | 0           |
| GOBP_POSITIVE_REGULATION_OF_CELL_ACTIVATION                                                                                        | 289  | -0.596866  | -2.3836842 | 0     | 0           |
| GOBP_POSITIVE_REGULATION_OF_T_CELL_PROLIFERATION                                                                                   | 77   | -0.6579624 | -2.375067  | 0     | 0           |
| GOBP_POSITIVE_REGULATION_OF_LEUKOCYTE_PROLIFERATION                                                                                | 117  | -0.6276081 | -2.360609  | 0     | 0           |
| GOBP_B_CELL_ACTIVATION                                                                                                             | 219  | -0.5969783 | -2.3569849 | 0     | 0           |
| GOBP_POSITIVE_REGULATION_OF_LEUKOCYTE_CELL_CELL_ADHESION                                                                           | 196  | -0.6006042 | -2.3548284 | 0     | 0           |
| GOBP_REGULATION_OF_B_CELL_ACTIVATION                                                                                               | 115  | -0.6243017 | -2.3476071 | 0     | 0           |
| GOBP_ALPHA_BETA_T_CELL_DIFFERENTIATION                                                                                             | 89   | -0.6387314 | -2.3447883 | 0     | 0           |
| GOBP_POSITIVE_REGULATION_OF_B_CELL_ACTIVATION                                                                                      | 77   | -0.6481271 | -2.3360827 | 0     | 0           |
| GOBP_B_CELL_PROLIFERATION                                                                                                          | 67   | -0.6596063 | -2.3290925 | 0     | 0           |
| GOBP_REGULATION_OF_T_CELL_DIFFERENTIATION                                                                                          | 123  | -0.6105623 | -2.3231664 | 0     | 0           |
| GOBP_REGULATION_OF_LEUKOCYTE_PROLIFERATION                                                                                         | 187  | -0.5929681 | -2.319425  | 0     | 0           |
| GOBP_T_CELL_DIFFERENTIATION                                                                                                        | 206  | -0.5874825 | -2.3170707 | 0     | 0           |
| GOBP_REGULATION_OF_LYMPHOCYTE_DIFFERENTIATION                                                                                      | 148  | -0.5985021 | -2.311673  | 0     | 0           |
| GOBP_CELLULAR_DEFENSE_RESPONSE                                                                                                     | 38   | -0.7124783 | -2.3060017 | 0     | 0           |
| GOBP_REGULATION_OF_LYMPHOCYTE_ACTIVATION                                                                                           | 370  | -0.5709478 | -2.3055615 | 0     | 0           |
| GOBP_LYMPHOCYTE_MIGRATION                                                                                                          | 80   | -0.6339475 | -2.30338   | 0     | 0           |
| GOBP_T_CELL_SELECTION                                                                                                              | 38   | -0.7085554 | -2.297034  | 0     | 0           |
| GOBP_LEUKOCYTE_PROLIFERATION                                                                                                       | 238  | -0.5752217 | -2.28417   | 0     | 0           |
| GOBP_ANTIGEN_RECEPTOR_MEDIATED_SIGNALING_PATHWAY                                                                                   | 233  | -0.5761899 | -2.2796462 | 0     | 0           |
| GOBP_REGULATION_OF_T_CELL_ACTIVATION                                                                                               | 265  | -0.5705994 | -2.2735913 | 0     | 0           |
| GOBP_REGULATION_OF_ALPHA_BETA_T_CELL_ACTIVATION                                                                                    | 80   | -0.6269385 | -2.271247  | 0     | 0           |
| GOBP_POSITIVE_REGULATION_OF_CELL_CELL_ADHESION                                                                                     | 230  | -0.5724195 | -2.26788   | 0     | 0           |
| GOBP_T_CELL_MIGRATION                                                                                                              | 53   | -0.6656491 | -2.2654603 | 0     | 0           |
| GOBP_INTERLEUKIN_4_PRODUCTION                                                                                                      | 29   | -0.7378844 | -2.2573328 | 0     | 0           |
| GOBP_ADAPTIVE_IMMUNE_RESPONSE_BASED_ON_SOMATIC_RECOMBINATION_OF_IMMUNE_RECEP<br>TORS_BUILT_FROM_IMMUNOGLOBULIN_SUPERFAMILY_DOMAINS | 234  | -0.5687107 | -2.2492518 | 0     | 2.98E-06    |
| GOBP_REGULATION_OF_CELL_ACTIVATION                                                                                                 | 468  | -0.5520781 | -2.245426  | 0     | 2.88E-06    |
| GOBP_MONONUCLEAR_CELL_DIFFERENTIATION                                                                                              | 336  | -0.5564137 | -2.2389948 | 0     | 2.78E-06    |
| GOBP_POSITIVE_REGULATION_OF_ALPHA_BETA_T_CELL_ACTIVATION                                                                           | 55   | -0.6518996 | -2.2327092 | 0     | 2.69E-06    |
| GOBP_HUMORAL_IMMUNE_RESPONSE_MEDIATED_BY_CIRCULATING_IMMUNOGLOBULIN                                                                | 56   | -0.6452255 | -2.2216325 | 0     | 2.61E-06    |
| GOBP_LYMPHOCYTE_MEDIATED_IMMUNITY                                                                                                  | 213  | -0.5613896 | -2.2115097 | 0     | 7.56E-06    |
| GOBP_INTERFERON_GAMMA_PRODUCTION                                                                                                   | 86   | -0.6052293 | -2.2098887 | 0     | 7.34E-06    |
| GOBP_POSITIVE_REGULATION_OF_LYMPHOCYTE_DIFFERENTIATION                                                                             | 88   | -0.601038  | -2.200775  | 0     | 1.43E-05    |
| GOBP_NEGATIVE_REGULATION_OF_INTERLEUKIN_6_PRODUCTION                                                                               | 36   | -0.6867633 | -2.1974807 | 0     | 1.85E-05    |
| GOBP_T_CELL_PROLIFERATION                                                                                                          | 152  | -0.5719871 | -2.1970255 | 0     | 1.80E-05    |
| GOBP_T_CELL_ACTIVATION                                                                                                             | 380  | -0.5405189 | -2.183739  | 0     | 1.97E-05    |
| GOBP_REGULATION_OF_ANTIGEN_RECEPTOR_MEDIATED_SIGNALING_PATHWAY                                                                     | 58   | -0.6304706 | -2.182941  | 0     | 1.92E-05    |
| GOBP_RESPONSE_TO_CHEMOKINE                                                                                                         | 57   | -0.6328475 | -2.1828885 | 0     | 1.87E-05    |
| GOBP_INTERLEUKIN_10_PRODUCTION                                                                                                     | 46   | -0.6526682 | -2.174941  | 0     | 2.03E-05    |
| GOBP_REGULATION_OF_B_CELL_PROLIFERATION                                                                                            | 52   | -0.6369289 | -2.174079  | 0     | 1.98E-05    |
| GOBP_LEUKOCYTE_CELL_CELL_ADHESION                                                                                                  | 291  | -0.5428124 | -2.172444  | 0     | 1.94E-05    |
| GOBP_REGULATION_OF_B_CELL_RECEPTOR_SIGNALING_PATHWAY                                                                               | 23   | -0.744792  | -2.1714225 | 0     | 2.08E-05    |
| GOBP_CD4_POSITIVE_ALPHA_BETA_T_CELL_DIFFERENTIATION                                                                                | 66   | -0.6157419 | -2.1699202 | 0     | 2.04E-05    |
| GOBP_INTERLEUKIN_2_PRODUCTION                                                                                                      | 55   | -0.632943  | -2.167681  | 0     | 2.17E-05    |
| GOBP_POSITIVE_REGULATION_OF_ANTIGEN_RECEPTOR_MEDIATED_SIGNALING_PATHWAY                                                            | 21   | -0.7550752 | -2.1667323 | 0     | 2.13E-05    |
| GOBP_MONONUCLEAR_CELL_MIGRATION                                                                                                    | 140  | -0.5624852 | -2.1527915 | 0     | 2.43E-05    |
| GOBP_LEUKOCYTE_TETHERING_OR_ROLLING                                                                                                | 25   | -0.7235997 | -2.1509452 | 0     | 2.72E-05    |
