# Supplementary material for: Optimizing Precision Medicine for Breast Cancer Brain Metastases with Functional Drug Response Assessment
Source: PubMed Central journal article supplement (PMC10284082; doi:10.1158/2767-9764.crc-22-0492), 2023-06-21
Supplement: crc-22-0492-s06.pdf [file crc-22-0492-s06.pdf]

## S6. Clinicopathologic characteristics of source patients for brain metastases PDX models: Group B.

| PDX ID | Age at BC | Age at BrMet | Germline mutation | Clinical subtype | Prior CNS directed therapy exposure | Prior systemic therapy exposure                                                                            | Non-CNS disease sites                  | OS from BrMet in years |
|--------|-----------|--------------|-------------------|------------------|-------------------------------------|------------------------------------------------------------------------------------------------------------|----------------------------------------|------------------------|
| BC3    | 32        | 34           | BRCA1             | TNBC             | None                                | Adjuvant CT (AC-T) – possibly Olaparib*                                                                    | Bone, lung, LN                         | 0.9                    |
| BC4    | 51        | 57           | None              | HR+ HER2-        | None                                | Adjuvant CT (AC-T), adjuvant AI -> metastatic: FUL, AI+ PAL, capecitabine, vinorelbine                     | Lung                                   | Alive** (4.2years)     |
| BC6    | 55        | 69           | None              | HER2+            | None                                | Adjuvant CT (TAC)-> metastatic: capecitabine, tamoxifen, FUL, docetaxel/HP, AI/lapatinib, T-DM1            | Lung, pleura, LN, bone                 | 1.3                    |
| BC9    | 26        | 27           | RAD50             | TNBC             | None                                | Adjuvant CT (AC-T)                                                                                         | Lung, bone, pericardium, LM            | 0.6                    |
| BC11   | 66        | 71           | None              | HR+ HER2-        | None                                | Adjuvant CT (AC-T), adjuvant tamoxifen -> metastatic: AI+PAL, FUL+EVE, capecitabine, eribulin, vinorelbine | Lung, pleura, skin, soft tissue, bone. | 0.3                    |
| BC16   | 43        | 44           | None              | HER2+            | SRS                                 | Neoadjuvant CT (AC-TH)                                                                                     | None                                   | Alive** (5.4years)     |

\* Unknown if received olaparib or placebo on a clinical trial

\*\* Alive at the last follow up time noted

BC, breast cancer, BrMet, brain metastases, CNS, central nervous system, OS, overall survival from the brain metastases diagnosis, TNBC, triple negative breast cancer, HR, hormonal receptor, HER2, human epidermal growth factor 2, SRS, stereotactic radiosurgery, CT, chemotherapy, AC-T, doxorubicin and cyclophosphamide followed by paclitaxel, TAC, docetaxel, doxorubicin, and cyclophosphamide, AI, aromatase inhibitor, HP, trastuzumab and Pertuzumab, T-DM1, ado-trastuzumab emtansine, AC-TH, doxorubicin and cyclophosphamide followed by paclitaxel and trastuzumab, LN, lymph nodes, LM, leptomeningeal metastases.
