# Supplementary material for: Optimizing Precision Medicine for Breast Cancer Brain Metastases with Functional Drug Response Assessment
Source: PubMed Central journal article supplement (PMC10284082; doi:10.1158/2767-9764.crc-22-0492), 2023-06-21
Supplement: crc-22-0492-s08.pdf [file crc-22-0492-s08.pdf]

### S8. DSS<sub>3</sub> values for chemotherapies commonly used in breast cancer treatment

| Drug                                  | BC3 | BC9 | BC4 | BC11 | BC6 | BC16 |
|---------------------------------------|-----|-----|-----|------|-----|------|
| Doxorubicin                           | 12  | 8   | 16  | 1    | 13  | 4    |
| Docetaxel                             | 2   | 31  | 0   | 0    | 0   | 0    |
| Paclitaxel                            | 0   | 13  | 18  | 2    | 16  | 0    |
| Eribulin Mesylate                     | 52  | 8   | 60  | 0    | 41  | 46   |
| 5-Fluorouracil (prodrug capecitabine) | 2   | 2   | 11  | 0    | 2   | 2    |
| Carboplatin                           | 0   | 3   | 0   | 0    | 1   | 0    |
| Gemcitabine                           | 62  | 37  | 0   | 0    | 0   | 0    |
| SN-38 (payload of sacituzumab)        | 49  | 54  | 14  | 6    | 9   | 10   |

Prior exposure in red
